# Supplementary material
Source: Springer Nature journal article supplement (https://www.springerprofessional.de/resource/supplementary/13638_2014_942_MOESM2_ESM.pdf/11898802)

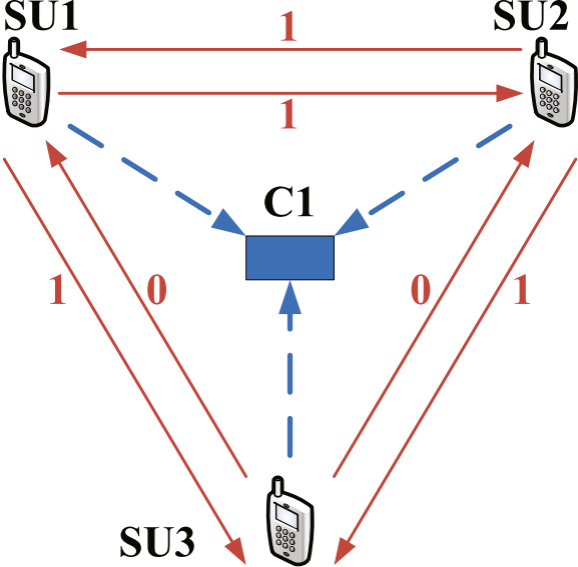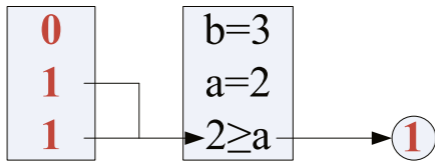

—  $\rightarrow$  Sensing     $\rightarrow$  Exchanging

Supplement: MOESM2 [file 11898802]
